# Supplementary material
Source: publisher figshare collection journal article supplement (https://gsajournals.figshare.com/ndownloader/files/28002705)
Supplement: Supplementary file 1 [file 28002705]

## Sheet: TableS2_Germination
Table S5: Germination and growth conditions for the eight eudicot species. All plants were grown in growth chambers at 20°C with 16h hours photoperiod at 100-120 mE light intensity for four to eight weeks to account for the different developmental rates.
Species	Germination	Soil growth
B.rapa	Direct sowing	4 weeks
C.endivia	Direct sowing	4 weeks
C.intybus	Direct sowing	4 weeks
G.max	Direct sowing	4 weeks
H.annuus	Scarification +2 weeks	4 weeks
Lactuca	On wet paper 1 week	8 weeks
Solanum	On wet paper 1 week	6 weeks
Arabidopsis	Direct sowing	5 weeks
